# Supplementary material for: Longitudinal relationships between glycemic status and body mass index in a multiethnic study: evidence from observational and genetic epidemiology
Source: PubMed Central journal article supplement (PMC4969745; doi:10.1038/srep30744), 2016-08-02
Supplement: srep30744-s1.pdf [file srep30744-s1.pdf]

**Longitudinal relationships between glycemic status and body mass index in a multiethnic study: evidence from observational and genetic epidemiology**

**Adeola F. Ishola<sup>1</sup>, Hertzel C. Gerstein<sup>1,2,3</sup>, James C. Engert<sup>4</sup>, Viswanathan Mohan<sup>5</sup>, Rafael Diaz<sup>6</sup>, Sonia S. Anand<sup>1,2,3</sup>, David Meyre<sup>1,2,7</sup>**

<sup>1</sup>Department of Clinical Epidemiology and Biostatistics, McMaster University, Hamilton, Ontario, Canada;

<sup>2</sup>Population Health Research Institute, McMaster University and Hamilton Health Sciences, Hamilton

General Hospital, Hamilton, Ontario, Canada; <sup>3</sup>Department of Medicine, McMaster University, Hamilton,

Ontario, Canada; <sup>4</sup>Research Institute of the McGill University Health Centre, Montreal, QC, Canada;

Departments of Medicine and Human Genetics, McGill University, Montreal, QC, Canada; <sup>5</sup>Madras

Diabetes Research Foundation, Chennai, India; <sup>6</sup>ECLA—Academic Research Organization, Rosario,

Argentina; <sup>7</sup>Department of Pathology and Molecular Medicine, McMaster University, Hamilton, Ontario,

Canada.

**Supplementary Table 1.** Description of the 23 SNPs selected in EpiDREAM.

| <b>Gene</b>    | <b>SNP</b> | <b>Risk Allele</b> | <b>Other Allele</b> | <b>Trait</b> | <b>Chromosome</b> | <b>Publication</b>           |
|----------------|------------|--------------------|---------------------|--------------|-------------------|------------------------------|
| <i>TNNI3K</i>  | rs1514176  | G                  | A                   | BMI          | 1                 | Speliotes, Nat Genet 2010    |
| <i>PCSK1</i>   | rs6235     | C                  | G                   | Obesity      | 5                 | Benzinou, Nat Genet 2008     |
|                | rs6232     | G                  | A                   |              |                   |                              |
| <i>CDKALI</i>  | rs2206734  | C                  | T                   | BMI          | 6                 | Okada, Nat Genet 2012        |
| <i>BDNF</i>    | rs6265     | G                  | A                   | BMI          | 11                | Thorleifsson, Nat Genet 2009 |
|                | rs1401635  | C                  | G                   |              |                   |                              |
| <i>FTO</i>     | rs9939609  | A                  | T                   | BMI          | 16                | Frayling, Science 2007       |
|                | rs7203521  | A                  | G                   |              |                   | Thorleifsson Nat Genet 2009  |
| <i>NPC1</i>    | rs1805081  | A                  | G                   | Obesity      | 18                | Meyre Nat Genet 2009         |
| <i>TFAP2PB</i> | rs2272903  | G                  | A                   | BMI          | 6                 | Speliotes, Nat Genet 2010    |
| <i>NTRK2</i>   | rs1211166  | A                  | G                   | BMI          | 9                 | Guo, Hum Mol Genet 2013      |
| <i>MAP2K5</i>  | rs997295   | T                  | G                   | BMI          | 15                | Speliotes, Nat Genet 2010    |
| <i>APOE</i>    | rs2075650  | A                  | G                   | BMI          | 19                | Guo, Hum Mol Genet 2013      |
| <i>GIPR</i>    | rs11671664 | G                  | A                   | BMI          | 19                | Speliotes, Nat Genet 2010    |
| <i>TALI</i>    | rs2984618  | T                  | G                   | BMI          | 1                 | Locke et al., Nat Genet 2015 |
| <i>LEPR</i>    | rs1011527  | A                  | G                   | Obesity      | 1                 | Wheeler Nat Genet 2013       |
| <i>POMC</i>    | rs7605927  | G                  | C                   | BMI          | 2                 | Graff Hum Mol Genet 2013     |
| <i>USP37</i>   | rs611203   | G                  | A                   | BMI          | 2                 | Locke et al., Nat Genet 2015 |
| <i>ITIH4</i>   | rs2535633  | G                  | C                   | BMI          | 3                 | Wen Hum Mol Genet 2014       |
| <i>NT5C2</i>   | rs3824755  | C                  | G                   | BMI          | 10                | Wen Hum Mol Genet 2014       |
| <i>TCF7L2</i>  | rs7903146  | C                  | T                   | BMI          | 10                | Locke et al., Nat Genet 2015 |
| <i>FANCL</i>   | rs12617233 | C                  | T                   | BMI          | 2                 | Locke et al., Nat Genet 2015 |
| <i>KAT8</i>    | rs749767   | A                  | G                   | BMI          | 16                | Locke et al., Nat Genet 2015 |

**Supplementary Table 2.** Genotype distributions of 23 obesity SNPs in the EpiDREAM study.

| Ethnicity                 | Major allele | Minor allele | Obesity risk allele | Genotype count |      |       | Obesity risk allele frequency | Genotype call rate | HWE P-value           |
|---------------------------|--------------|--------------|---------------------|----------------|------|-------|-------------------------------|--------------------|-----------------------|
| <b>rs9939609 – FTO</b>    |              |              |                     |                |      |       |                               |                    |                       |
|                           |              |              |                     | AA             | AT   | TT    |                               |                    |                       |
| South Asian               | T            | A            | A                   | 323            | 1182 | 1251  | 0.332                         | 100 %              | 0.088                 |
| East Asian                |              |              |                     | 5              | 69   | 151   | 0.176                         | 100 %              | 0.373                 |
| European                  |              |              |                     | 1698           | 4468 | 3214  | 0.419                         | 100 %              | 0.035                 |
| African                   |              |              |                     | 293            | 640  | 314   | 0.491                         | 100 %              | 0.345                 |
| Latin American            |              |              |                     | 392            | 1440 | 1455  | 0.338                         | 100 %              | 0.218                 |
| Native North American     |              |              |                     | 32             | 166  | 301   | 0.230                         | 100 %              | 0.165                 |
| <b>Total</b>              |              |              |                     | 2743           | 7965 | 6686  | 0.387                         | 100 %              | N.A.                  |
| <b>rs7203521 – FTO</b>    |              |              |                     |                |      |       |                               |                    |                       |
|                           |              |              |                     | AA             | GA   | GG    |                               |                    |                       |
| South Asian               | A            | G            | A                   | 521            | 1325 | 909   | 0.429                         | 99.96%             | 0.328                 |
| East Asian                |              |              |                     | 15             | 86   | 124   | 0.258                         | 100 %              | 0.986                 |
| European                  |              |              |                     | 3538           | 4370 | 1472  | 0.610                         | 100 %              | 0.045                 |
| African                   |              |              |                     | 503            | 569  | 175   | 0.632                         | 100 %              | 0.489                 |
| Latin American            |              |              |                     | 769            | 1548 | 969   | 0.469                         | 99.97 %            | 0.002                 |
| Native North American     |              |              |                     | 93             | 202  | 203   | 0.389                         | 99.80 %            | 0.001                 |
| <b>Total</b>              |              |              |                     | 5439           | 8100 | 3852  | 0.546                         | 99.98 %            | N.A.                  |
| <b>rs1514176 – TNNT3K</b> |              |              |                     |                |      |       |                               |                    |                       |
|                           |              |              |                     | AA             | GA   | GG    |                               |                    |                       |
| South Asian               | A            | G            | G                   | 565            | 1357 | 834   | 0.549                         | 100 %              | 0.762                 |
| East Asian                |              |              |                     | 35             | 70   | 120   | 0.689                         | 100 %              | 3.90x10 <sup>-5</sup> |
| European                  |              |              |                     | 3173           | 4555 | 1652  | 0.419                         | 100 %              | 0.804                 |
| African                   |              |              |                     | 137            | 551  | 559   | 0.669                         | 100 %              | 0.944                 |
| Latin American            |              |              |                     | 805            | 1564 | 918   | 0.517                         | 100 %              | 0.010                 |
| Native North American     |              |              |                     | 97             | 245  | 157   | 0.560                         | 100 %              | 0.935                 |
| <b>Total</b>              |              |              |                     | 4812           | 8342 | 4240  | 0.484                         | 100 %              | N.A.                  |
| <b>rs6265 – BDNF</b>      |              |              |                     |                |      |       |                               |                    |                       |
|                           |              |              |                     | AA             | AG   | GG    |                               |                    |                       |
| South Asian               | G            | A            | G                   | 146            | 952  | 1658  | 0.774                         | 100 %              | 0.540                 |
| East Asian                |              |              |                     | 46             | 117  | 62    | 0.536                         | 100 %              | 0.497                 |
| European                  |              |              |                     | 345            | 2807 | 6228  | 0.814                         | 100 %              | 0.194                 |
| African                   |              |              |                     | 4              | 74   | 1169  | 0.967                         | 100 %              | 0.018                 |
| Latin American            |              |              |                     | 94             | 859  | 2334  | 0.841                         | 100 %              | 0.166                 |
| Native North American     |              |              |                     | 14             | 128  | 357   | 0.844                         | 100 %              | 0.539                 |
| <b>Total</b>              |              |              |                     | 649            | 4937 | 11808 | 0.821                         | 100 %              | N.A.                  |
| <b>rs1401635 – BDNF</b>   |              |              |                     |                |      |       |                               |                    |                       |
|                           |              |              |                     | CC             | CG   | GG    |                               |                    |                       |
| South Asian               | G            | C            | C                   | 424            | 1255 | 1076  | 0.382                         | 99.96 %            | 0.067                 |
| East Asian                |              |              |                     | 4              | 28   | 193   | 0.080                         | 100 %              | 0.020                 |
| European                  |              |              |                     | 826            | 3801 | 4752  | 0.291                         | 99.99 %            | 0.094                 |
| African                   |              |              |                     | 77             | 478  | 692   | 0.253                         | 100 %              | 0.645                 |
| Latin American            |              |              |                     | 156            | 1119 | 2012  | 0.218                         | 100 %              | 0.979                 |
| Native North American     |              |              |                     | 28             | 168  | 303   | 0.224                         | 100 %              | 0.462                 |
| <b>Total</b>              |              |              |                     | 1515           | 6849 | 9028  | 0.284                         | 99.99 %            | N.A.                  |
| <b>rs1805081 – NPC1</b>   |              |              |                     |                |      |       |                               |                    |                       |
|                           |              |              |                     | AA             | GA   | GG    |                               |                    |                       |
| South Asian               | A            | G            | A                   | 1628           | 973  | 155   | 0.767                         | 100 %              | 0.545                 |
| East Asian                |              |              |                     | 133            | 77   | 15    | 0.762                         | 100 %              | 0.402                 |
| European                  |              |              |                     | 3552           | 4385 | 1443  | 0.612                         | 100 %              | 0.140                 |
| African                   |              |              |                     | 1083           | 158  | 6     | 0.92                          | 100 %              | 0.928                 |
| Latin American            |              |              |                     | 1588           | 1372 | 327   | 0.692                         | 100 %              | 0.226                 |
| Native North American     |              |              |                     | 224            | 231  | 44    | 0.680                         | 100 %              | 0.151                 |
| <b>Total</b>              |              |              |                     | 8208           | 7196 | 1990  | 0.679                         | 100 %              | N.A.                  |
| <b>rs6232 – PCSK1</b>     |              |              |                     |                |      |       |                               |                    |                       |
|                           |              |              |                     | AA             | GA   | GG    |                               |                    |                       |
| South Asian               | A            | G            | G                   | 2431           | 309  | 16    | 0.062                         | 100 %              | 0.074                 |
| East Asian                |              |              |                     | 223            | 2    | 0     | 0.004                         | 100 %              | 0.947                 |
| European                  |              |              |                     | 8491           | 866  | 23    | 0.049                         | 100 %              | 0.853                 |

|                              |   |   |   |       |      |       |       |         |       |
|------------------------------|---|---|---|-------|------|-------|-------|---------|-------|
| <b>African</b>               |   |   |   | 1229  | 18   | 0     | 0.007 | 100 %   | 0.797 |
| <b>Latin American</b>        |   |   |   | 3099  | 185  | 3     | 0.029 | 100 %   | 0.889 |
| <b>Native North American</b> |   |   |   | 470   | 29   | 0     | 0.029 | 100 %   | 0.504 |
| <b>Total</b>                 |   |   |   | 15943 | 1409 | 42    | 0.043 | 100 %   | N.A.  |
| <b>rs6235 – PCSKI</b>        |   |   |   |       |      |       |       |         |       |
|                              |   |   |   | CC    | CG   | GG    |       |         |       |
| <b>South Asian</b>           | G | C | C | 262   | 1096 | 1397  | 0.294 | 99.96 % | 0.029 |
| <b>East Asian</b>            |   |   |   | 20    | 93   | 112   | 0.296 | 100 %   | 0.912 |
| <b>European</b>              |   |   |   | 684   | 3612 | 5083  | 0.265 | 99.99 % | 0.225 |
| <b>African</b>               |   |   |   | 27    | 329  | 891   | 0.154 | 100 %   | 0.600 |
| <b>Latin American</b>        |   |   |   | 157   | 1084 | 2046  | 0.213 | 100 %   | 0.384 |
| <b>Native North American</b> |   |   |   | 27    | 188  | 284   | 0.242 | 100 %   | 0.568 |
| <b>Total</b>                 |   |   |   | 1177  | 6402 | 9813  | 0.252 | 99.99 % | N.A.  |
| <b>rs2206734 – CDKALI</b>    |   |   |   |       |      |       |       |         |       |
|                              |   |   |   | CC    | TC   | TT    |       |         |       |
| <b>South Asian</b>           | C | T | C | 1623  | 974  | 159   | 0.766 | 100 %   | 0.421 |
| <b>East Asian</b>            |   |   |   | 102   | 94   | 29    | 0.662 | 100 %   | 0.321 |
| <b>European</b>              |   |   |   | 6015  | 3018 | 346   | 0.802 | 99.99 % | 0.174 |
| <b>African</b>               |   |   |   | 715   | 460  | 72    | 0.758 | 100 %   | 0.861 |
| <b>Latin American</b>        |   |   |   | 2104  | 1047 | 136   | 0.799 | 100 %   | 0.689 |
| <b>Native North American</b> |   |   |   | 299   | 182  | 18    | 0.782 | 100 %   | 0.128 |
| <b>Total</b>                 |   |   |   | 10858 | 5775 | 760   | 0.790 | 99.99 % | N.A.  |
| <b>rs2075650 – APOE</b>      |   |   |   |       |      |       |       |         |       |
|                              |   |   |   | AA    | GA   | GG    |       |         |       |
| <b>South Asian</b>           | A | G | A | 2084  | 621  | 51    | 0.869 | 100 %   | 0.549 |
| <b>East Asian</b>            |   |   |   | 173   | 47   | 5     | 0.873 | 100 %   | 0.402 |
| <b>European</b>              |   |   |   | 6951  | 2248 | 181   | 0.861 | 100 %   | 0.962 |
| <b>African</b>               |   |   |   | 956   | 278  | 13    | 0.878 | 100 %   | 0.144 |
| <b>Latin American</b>        |   |   |   | 2593  | 647  | 47    | 0.887 | 100 %   | 0.361 |
| <b>Native North American</b> |   |   |   | 398   | 96   | 5     | 0.894 | 100 %   | 0.767 |
| <b>Total</b>                 |   |   |   | 13155 | 3937 | 302   | 0.870 | 100 %   | N.A.  |
| <b>rs2272903 – TFAP2B</b>    |   |   |   |       |      |       |       |         |       |
|                              |   |   |   | AA    | AG   | GG    |       |         |       |
| <b>South Asian</b>           | G | A | G | 132   | 945  | 1679  | 0.781 | 100 %   | 0.948 |
| <b>East Asian</b>            |   |   |   | 8     | 77   | 140   | 0.793 | 100 %   | 0.513 |
| <b>European</b>              |   |   |   | 118   | 1778 | 7484  | 0.893 | 100 %   | 0.286 |
| <b>African</b>               |   |   |   | 120   | 487  | 640   | 0.709 | 100 %   | 0.054 |
| <b>Latin American</b>        |   |   |   | 72    | 783  | 2432  | 0.859 | 100 %   | 0.338 |
| <b>Native North American</b> |   |   |   | 4     | 99   | 396   | 0.893 | 100 %   | 0.417 |
| <b>Total</b>                 |   |   |   | 454   | 4169 | 12771 | 0.854 | 100 %   | N.A.  |
| <b>rs997295 – MAP2K5</b>     |   |   |   |       |      |       |       |         |       |
|                              |   |   |   | GG    | GT   | TT    |       |         |       |
| <b>South Asian</b>           | T | G | T | 835   | 1336 | 585   | 0.455 | 100 %   | 0.239 |
| <b>East Asian</b>            |   |   |   | 151   | 63   | 11    | 0.189 | 100 %   | 0.196 |
| <b>European</b>              |   |   |   | 1597  | 4495 | 3288  | 0.590 | 100 %   | 0.363 |
| <b>African</b>               |   |   |   | 261   | 616  | 370   | 0.544 | 100 %   | 0.876 |
| <b>Latin American</b>        |   |   |   | 994   | 1584 | 708   | 0.456 | 99.97 % | 0.102 |
| <b>Native North American</b> |   |   |   | 168   | 222  | 109   | 0.441 | 100 %   | 0.029 |
| <b>Total</b>                 |   |   |   | 4006  | 8316 | 5071  | 0.531 | 99.99 % | N.A.  |
| <b>rs1211166 – NTRK2</b>     |   |   |   |       |      |       |       |         |       |
|                              |   |   |   | AA    | GA   | GG    |       |         |       |
| <b>South Asian</b>           | A | G | A | 1436  | 1105 | 215   | 0.722 | 100 %   | 0.905 |
| <b>East Asian</b>            |   |   |   | 151   | 63   | 11    | 0.811 | 100 %   | 0.196 |
| <b>European</b>              |   |   |   | 6115  | 2898 | 365   | 0.806 | 99.98 % | 0.351 |
| <b>African</b>               |   |   |   | 567   | 540  | 139   | 0.671 | 99.92 % | 0.542 |
| <b>Latin American</b>        |   |   |   | 2114  | 1019 | 154   | 0.798 | 100 %   | 0.030 |
| <b>Native North American</b> |   |   |   | 378   | 111  | 10    | 0.869 | 100 %   | 0.582 |
| <b>Total</b>                 |   |   |   | 10761 | 5736 | 894   | 0.784 | 99.98 % | N.A.  |
| <b>rs11671664 – GIPR</b>     |   |   |   |       |      |       |       |         |       |
|                              |   |   |   | AA    | AG   | GG    |       |         |       |
| <b>South Asian</b>           | G | A | G | 33    | 521  | 2202  | 0.894 | 100 %   | 0.727 |
| <b>East Asian</b>            |   |   |   | 41    | 89   | 95    | 0.620 | 100 %   | 0.016 |

|                              |   |   |   |       |      |       |       |         |                      |
|------------------------------|---|---|---|-------|------|-------|-------|---------|----------------------|
| <b>European</b>              |   |   |   | 122   | 1767 | 7488  | 0.892 | 99.97 % | 0.126                |
| <b>African</b>               |   |   |   | 15    | 256  | 976   | 0.885 | 100 %   | 0.696                |
| <b>Latin American</b>        |   |   |   | 29    | 531  | 2726  | 0.910 | 99.97 % | 0.577                |
| <b>Native North American</b> |   |   |   | 3     | 102  | 394   | 0.892 | 100 %   | 0.187                |
| <b>Total</b>                 |   |   |   | 243   | 3266 | 13881 | 0.892 | 99.98 % | N.A.                 |
| <b>rs2984618- TALI</b>       |   |   |   |       |      |       |       |         |                      |
|                              |   |   |   | GG    | GT   | TT    |       |         |                      |
| <b>South Asian</b>           | G | T | T | 554   | 1313 | 889   | 0.561 | 100 %   | 0.084                |
| <b>East Asian</b>            |   |   |   | 3     | 19   | 203   | 0.944 | 100 %   | 0.003                |
| <b>European</b>              |   |   |   | 3414  | 4445 | 1521  | 0.399 | 100 %   | 0.245                |
| <b>African</b>               |   |   |   | 87    | 484  | 676   | 0.736 | 100 %   | 0.977                |
| <b>Latin American</b>        |   |   |   | 766   | 1513 | 1008  | 0.537 | 100 %   | 2.0x10 <sup>-5</sup> |
| <b>Native North American</b> |   |   |   | 115   | 248  | 136   | 0.521 | 100 %   | 0.924                |
| <b>Total</b>                 |   |   |   | 4939  | 8022 | 4433  | 0.485 | 100 %   | N.A.                 |
| <b>rs1011527- LEPR</b>       |   |   |   |       |      |       |       |         |                      |
|                              |   |   |   | GG    | GA   | AA    |       |         |                      |
| <b>South Asian</b>           | G | A | A | 1362  | 1144 | 250   | 0.299 | 100 %   | 0.660                |
| <b>East Asian</b>            |   |   |   | 184   | 40   | 1     | 0.093 | 100 %   | 0.449                |
| <b>European</b>              |   |   |   | 8038  | 1284 | 56    | 0.074 | 99.98 % | 0.544                |
| <b>African</b>               |   |   |   | 928   | 293  | 26    | 0.138 | 100 %   | 0.612                |
| <b>Latin American</b>        |   |   |   | 2845  | 428  | 13    | 0.069 | 99.97 % | 0.467                |
| <b>Native North American</b> |   |   |   | 450   | 47   | 2     | 0.051 | 100 %   | 0.520                |
| <b>Total</b>                 |   |   |   | 13807 | 3236 | 348   | 0.113 | 99.98 % | N.A.                 |
| <b>rs7605927- POMC</b>       |   |   |   |       |      |       |       |         |                      |
|                              |   |   |   | GG    | CG   | CC    |       |         |                      |
| <b>South Asian</b>           | C | G | C | 586   | 1364 | 794   | 0.536 | 99.56 % | 0.996                |
| <b>East Asian</b>            |   |   |   | 73    | 113  | 39    | 0.424 | 100 %   | 0.675                |
| <b>European</b>              |   |   |   | 577   | 3386 | 5413  | 0.758 | 99.96 % | 0.123                |
| <b>African</b>               |   |   |   | 263   | 578  | 406   | 0.557 | 100 %   | 0.032                |
| <b>Latin American</b>        |   |   |   | 508   | 1491 | 1282  | 0.617 | 99.82 % | 0.031                |
| <b>Native North American</b> |   |   |   | 77    | 215  | 207   | 0.630 | 100 %   | 0.092                |
| <b>Total</b>                 |   |   |   | 2084  | 7147 | 8141  | 0.673 | 99.87 % | N.A.                 |
| <b>rs611203- USP37</b>       |   |   |   |       |      |       |       |         |                      |
|                              |   |   |   | AA    | GA   | GG    |       |         |                      |
| <b>South Asian</b>           | A | G | G | 1351  | 1101 | 303   | 0.310 | 99.96 % | 0.001                |
| <b>East Asian</b>            |   |   |   | 149   | 66   | 10    | 0.191 | 100 %   | 0.442                |
| <b>European</b>              |   |   |   | 3264  | 4517 | 1599  | 0.411 | 100 %   | 0.591                |
| <b>African</b>               |   |   |   | 452   | 616  | 179   | 0.391 | 100 %   | 0.183                |
| <b>Latin American</b>        |   |   |   | 1094  | 1630 | 563   | 0.420 | 100 %   | 0.292                |
| <b>Native North American</b> |   |   |   | 218   | 219  | 62    | 0.344 | 100 %   | 0.544                |
| <b>Total</b>                 |   |   |   | 6528  | 8149 | 2716  | 0.390 | 99.99 % | N.A.                 |
| <b>rs2535633- ITIH4</b>      |   |   |   |       |      |       |       |         |                      |
|                              |   |   |   | GG    | CG   | CC    |       |         |                      |
| <b>South Asian</b>           | G | C | C | 456   | 1287 | 1013  | 0.399 | 100 %   | 0.168                |
| <b>East Asian</b>            |   |   |   | 27    | 111  | 87    | 0.367 | 100 %   | 0.351                |
| <b>European</b>              |   |   |   | 1565  | 4503 | 3309  | 0.407 | 99.97 % | 0.618                |
| <b>African</b>               |   |   |   | 584   | 538  | 125   | 0.684 | 100 %   | 0.946                |
| <b>Latin American</b>        |   |   |   | 774   | 1618 | 894   | 0.482 | 99.97 % | 0.426                |
| <b>Native North American</b> |   |   |   | 123   | 245  | 131   | 0.492 | 100 %   | 0.691                |
| <b>Total</b>                 |   |   |   | 3529  | 8302 | 5559  | 0.442 | 99.98 % | N.A.                 |
| <b>rs3824755- NT5C2</b>      |   |   |   |       |      |       |       |         |                      |
|                              |   |   |   | GG    | CG   | CC    |       |         |                      |
| <b>South Asian</b>           | G | C | C | 178   | 961  | 1617  | 0.761 | 100 %   | 0.030                |
| <b>East Asian</b>            |   |   |   | 15    | 100  | 110   | 0.711 | 100 %   | 0.220                |
| <b>European</b>              |   |   |   | 103   | 1671 | 7606  | 0.900 | 100 %   | 0.297                |
| <b>African</b>               |   |   |   | 45    | 395  | 807   | 0.806 | 100 %   | 0.696                |
| <b>Latin American</b>        |   |   |   | 93    | 903  | 2291  | 0.834 | 100 %   | 0.723                |
| <b>Native North American</b> |   |   |   | 8     | 122  | 369   | 0.862 | 100 %   | 0.562                |
| <b>Total</b>                 |   |   |   | 442   | 4152 | 12800 | 0.855 | 100 %   | N.A.                 |
| <b>rs7903146- TCFL72</b>     |   |   |   |       |      |       |       |         |                      |
|                              |   |   |   | TT    | CT   | CC    |       |         |                      |
| <b>South Asian</b>           | C | T | C | 272   | 1170 | 1314  | 0.689 | 100 %   | 0.624                |

|                              |   |   |   |      |      |      |       |         |       |
|------------------------------|---|---|---|------|------|------|-------|---------|-------|
| <b>East Asian</b>            |   |   |   | 2    | 22   | 201  | 0.942 | 100 %   | 0.126 |
| <b>European</b>              |   |   |   | 956  | 3903 | 4521 | 0.690 | 100 %   | 0.01  |
| <b>African</b>               |   |   |   | 112  | 520  | 615  | 0.702 | 100 %   | 0.890 |
| <b>Latin American</b>        |   |   |   | 280  | 1304 | 1703 | 0.716 | 100 %   | 0.177 |
| <b>Native North American</b> |   |   |   | 10   | 145  | 344  | 0.835 | 100 %   | 0.238 |
| <b>Total</b>                 |   |   |   | 1632 | 7064 | 8698 | 0.703 | 100 %   | N.A.  |
| <b>rs126172333- FANCL</b>    |   |   |   |      |      |      |       |         |       |
|                              |   |   |   | TT   | TC   | CC   |       |         |       |
| <b>South Asian</b>           | G | A | G | 352  | 1301 | 1103 | 0.636 | 100 %   | 0.297 |
| <b>East Asian</b>            |   |   |   | 67   | 119  | 39   | 0.438 | 100 %   | 0.264 |
| <b>European</b>              |   |   |   | 1537 | 4480 | 3363 | 0.597 | 100 %   | 0.489 |
| <b>African</b>               |   |   |   | 152  | 579  | 516  | 0.646 | 100 %   | 0.593 |
| <b>Latin American</b>        |   |   |   | 638  | 1583 | 1066 | 0.565 | 100 %   | 0.247 |
| <b>Native North American</b> |   |   |   | 76   | 247  | 176  | 0.600 | 100 %   | 0.483 |
| <b>Total</b>                 |   |   |   | 2822 | 8309 | 6263 | 0.599 | 100 %   | N.A.  |
| <b>rs749767- KAT8</b>        |   |   |   |      |      |      |       |         |       |
|                              |   |   |   | GG   | GA   | AA   |       |         |       |
| <b>South Asian</b>           | A | G | A | 52   | 620  | 2082 | 0.868 | 99.93 % | 0.461 |
| <b>East Asian</b>            |   |   |   | 154  | 60   | 11   | 0.182 | 100 %   | 0.114 |
| <b>European</b>              |   |   |   | 1437 | 4477 | 3466 | 0.608 | 100 %   | 0.889 |
| <b>African</b>               |   |   |   | 111  | 496  | 640  | 0.712 | 100 %   | 0.291 |
| <b>Latin American</b>        |   |   |   | 715  | 1559 | 1012 | 0.545 | 99.97 % | 0.013 |
| <b>Native North American</b> |   |   |   | 109  | 232  | 158  | 0.549 | 100 %   | 0.172 |
| <b>Total</b>                 |   |   |   | 2578 | 7444 | 7369 | 0.638 | 99.98 % | N.A.  |

**Supplementary Table 3.** Proportion of subjects with NGT, IFG/IGT and T2D within each ethnic groups at baseline.

| <i><b>Ethnicity</b></i>      | <i><b>NGT</b></i> | <i><b>IFG/IGT</b></i> | <i><b>T2D</b></i> | <i><b>All</b></i> |
|------------------------------|-------------------|-----------------------|-------------------|-------------------|
| <i>South Asian</i>           | 1566 (56.5)       | 756 (27.4 %)          | 4454 (16.1 %)     | 2756 (100 %)      |
| <i>East Asian</i>            | 74 (32.9 %)       | 100 (44.4 %)          | 51 (22.7 %)       | 225 (100 %)       |
| <i>European</i>              | 3671 (39.1 %)     | 4355 (46.5 %)         | 1354 (14.4 %)     | 9380 (100 %)      |
| <i>African</i>               | 465 (37.3 %)      | 557 (44.8 %)          | 225 (18.0 %)      | 1247 (100 %)      |
| <i>Latino American</i>       | 1460 (44.4 %)     | 1402 (42.7 %)         | 425 (12.9 %)      | 3287 (100 %)      |
| <i>Native North American</i> | 221 (44.3 %)      | 219 (43.9 %)          | 59 (11.8 %)       | 499 (100 %)       |

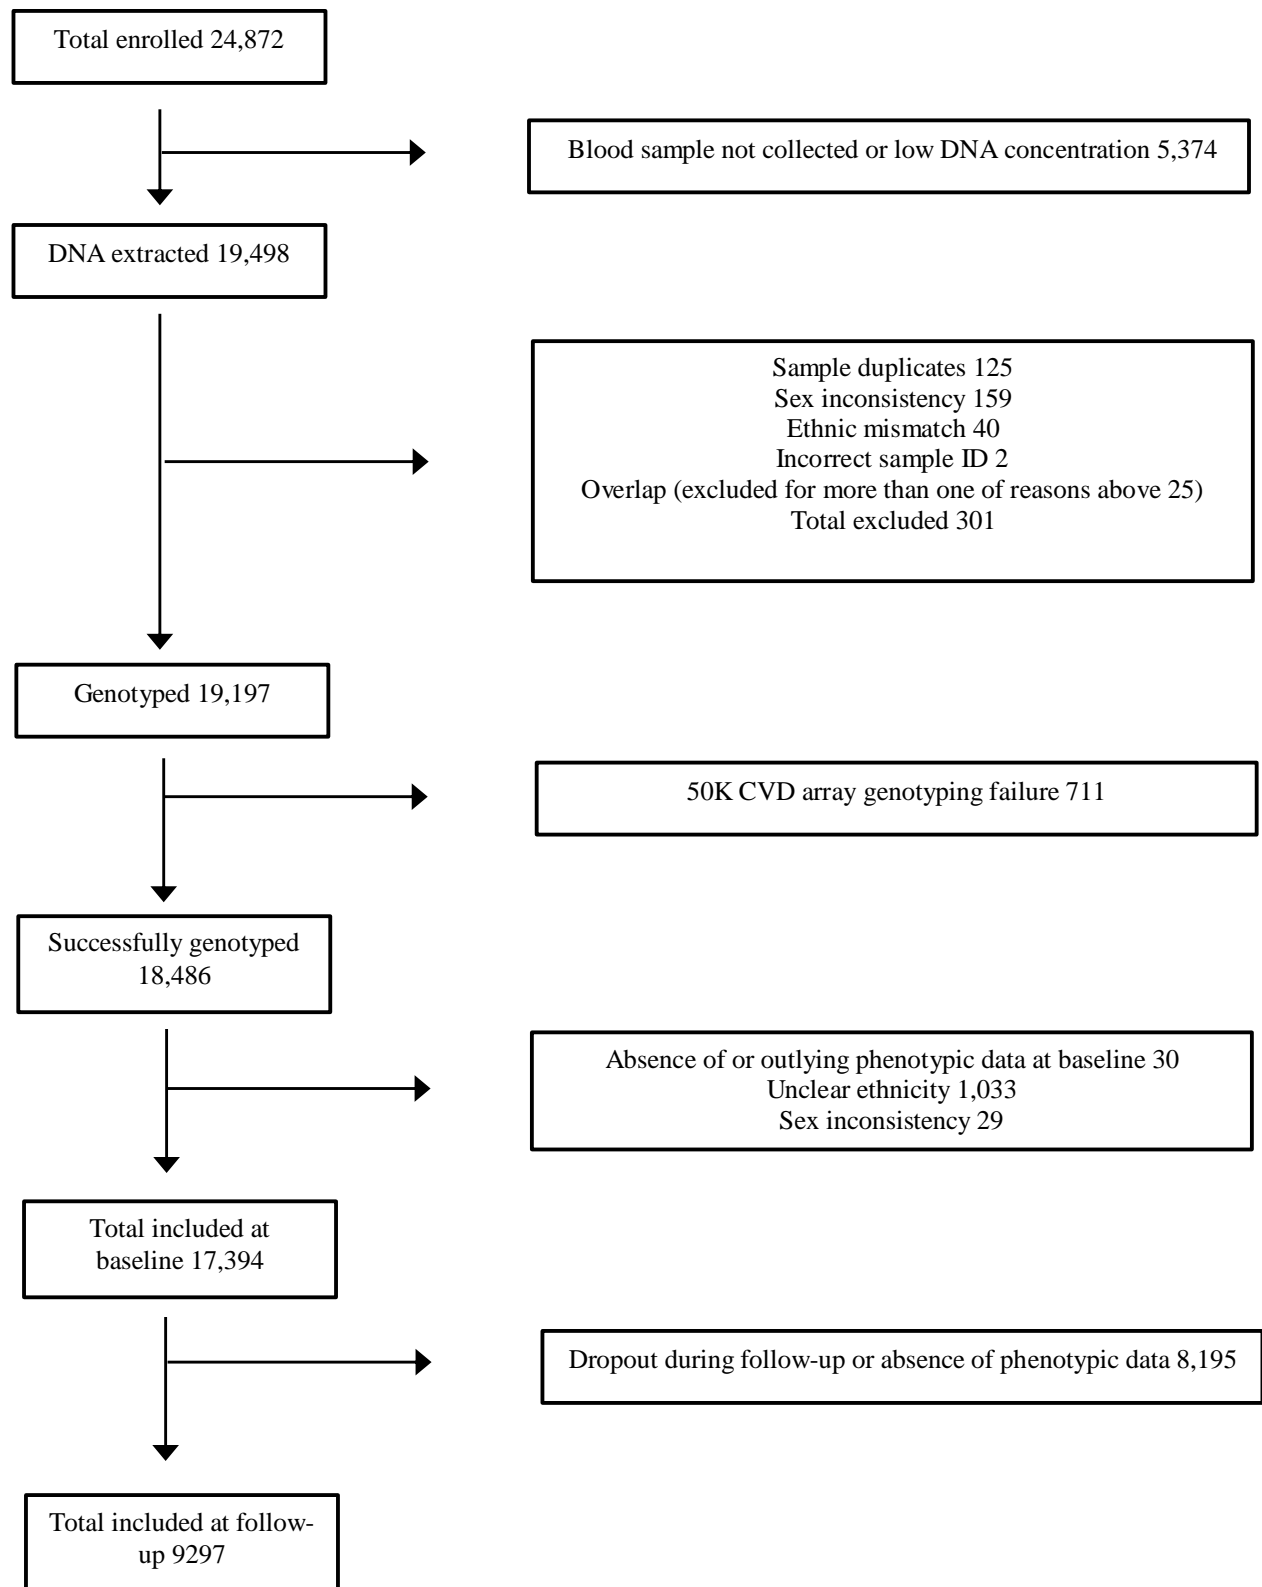

**Supplementary Figure 1.** EpiDREAM study selection process overview.



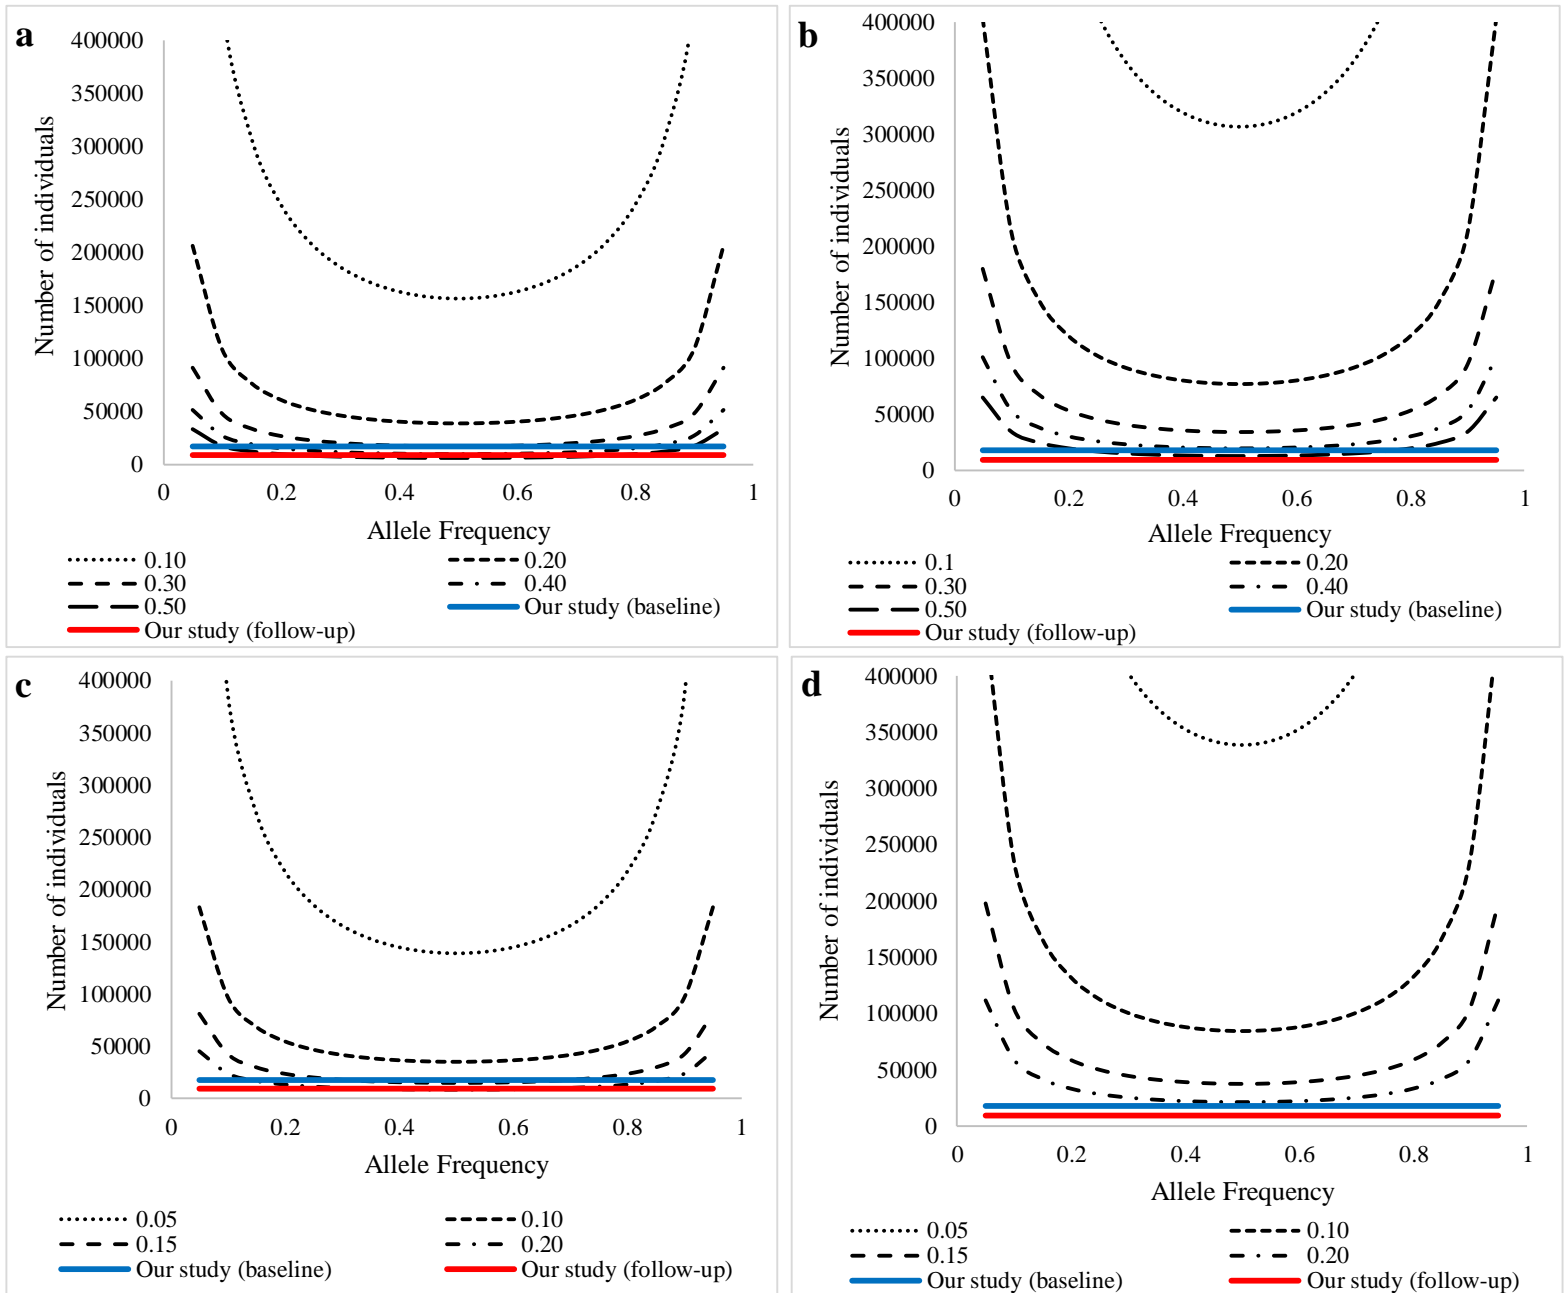

**Supplementary Figure 2.** Number of individuals required for a statistical power of 80% based on obesity risk allele frequency and beta effect values. a) Main effect analysis using a  $P$ -value of 0.05, unadjusted for multiple testing; b) Main effect analysis after adjusting for multiple testing (adjusted  $P$ -value =  $2.1 \times 10^{-3}$ ) with the Bonferroni correction method; c) Gene-environment interaction effect analysis using a  $P$ -value of 0.05, unadjusted for multiple testing; d) Gene-environment interaction effect after adjusting for multiple testing (adjusted  $P$ -value =  $4.2 \times 10^{-4}$  with the Bonferroni correction method).
